# Supplementary material for: Sphingosine 1-Phosphate Receptor 2 and 3 Mediate Bone Marrow-Derived Monocyte/Macrophage Motility in Cholestatic Liver Injury in Mice
Source: PubMed Central journal article supplement (PMC4555045; doi:10.1038/srep13423), 2015-09-01

# **Sphingosine 1-Phosphate Receptor 2 and 3 Mediate Bone Marrow-Derived Monocyte/Macrophage Motility in Cholestatic Liver Injury in Mice**

Le Yang<sup>1</sup>, Zhen Han<sup>1</sup>, Lei Tian, Ping Mai, Yuanyuan Zhang, Lin Wang and Liying Li\*

## **Supplementary Information**

### **Supplementary Methods**

#### *siRNA treatment in vivo*

Chemically modified and stable siRNAs of S1PR<sub>2</sub> (sense, UAA CUC CCG UGC AGU GGU UUU; antisense, 5'-pAAC CAC UGC ACG GGA GUU AUU) and S1PR<sub>3</sub> (sense, GGA GGG CAG UAU GUU CGU AUU; antisense, 5'-pUAC GAA CAU ACU GCC CUC CUU) were purchased from Thermo Scientific (Lafayette, CO), and were delivered *in vivo* using a “hydrodynamic transfection method”, by which 50 µg siRNA dissolved in 1 mL PBS was rapidly injected into the tail vein. Control mice were injected with an equal volume of scramble siRNA dissolved in PBS. These siRNAs were injected one day before BDL-induced liver injury, and twice per week after BDL operation for 2 weeks.

### **Supplementary Figure legends**

**Supplemental Figure 1. The effect of S1PR<sub>2</sub>- or S1PR<sub>3</sub>-siRNA *in vivo* in cholestatic liver injury.** Knock-down of S1PR<sub>2</sub> or S1PR<sub>3</sub> by their siRNAs *in vivo* in BM. \*  $p < 0.05$  vs. Controls (n = 7 per group).

**Supplementary Figure 2. S1PR<sub>2</sub> or S1PR<sub>3</sub> siRNA *in vivo* reduced the recruitment of BMM.** The proportion of BMM (EGFP<sup>+</sup>/F4/80<sup>+</sup>) among nonparenchymal cells were analyzed by FACS (n = 7 per group).

supplementary figure 1

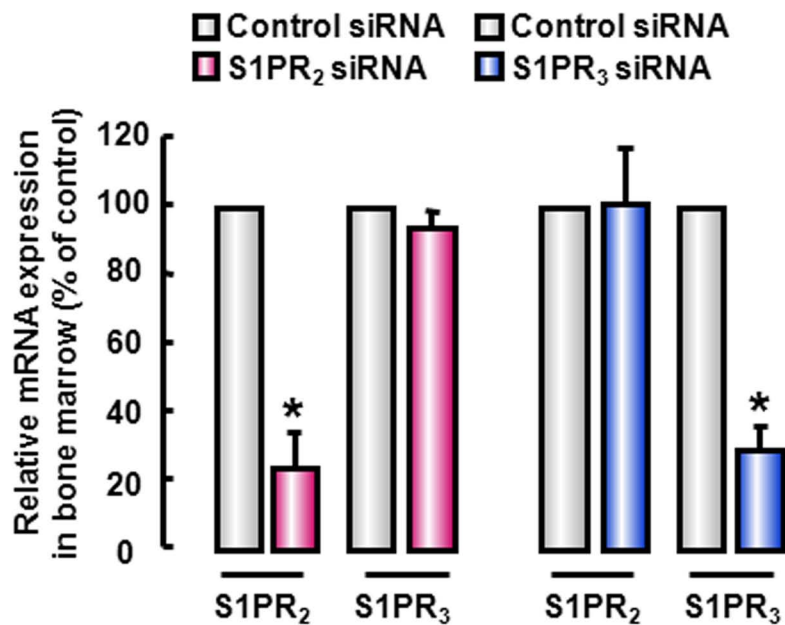

## supplementary figure 2

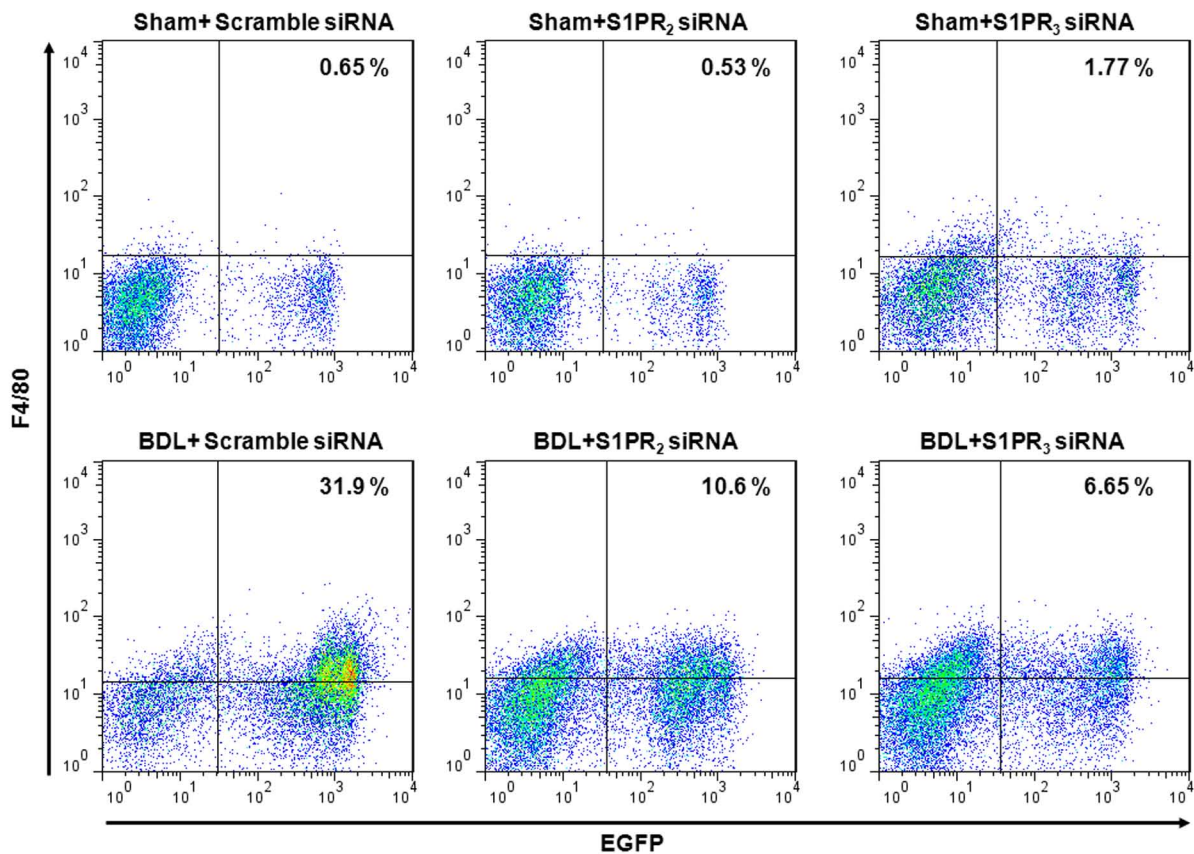

Supplement: srep13423-s1.pdf [file srep13423-s1.pdf]
